# Supplementary material
Source: bioRxiv or medRxiv preprint supplement (https://www.biorxiv.org/highwire/filestream/123422/field_highwire_adjunct_files/0/398750-1.pdf)

Supplementary figure 1

a. Panc1

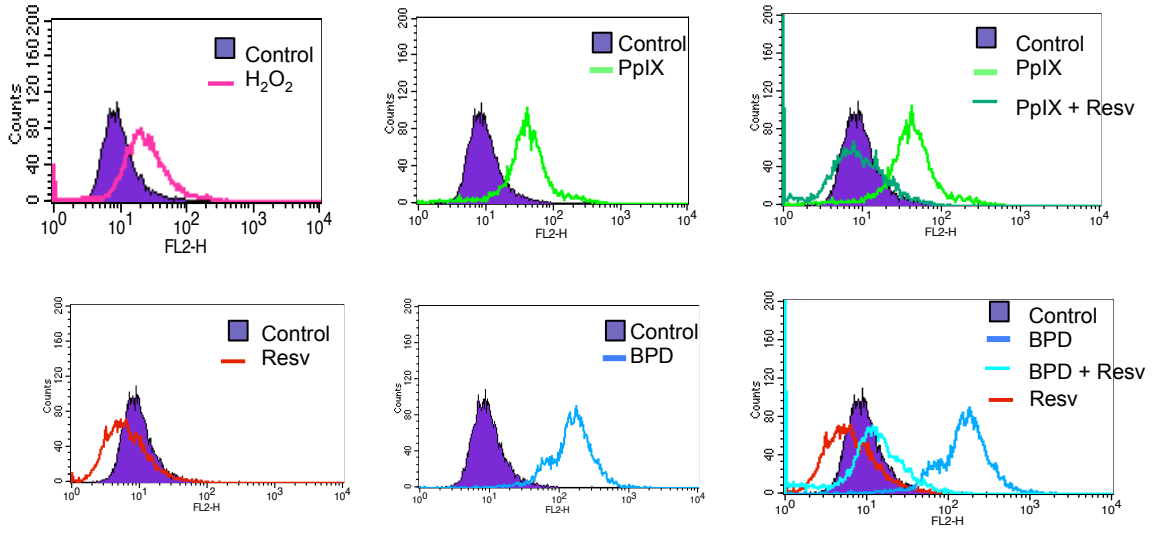

b. HPDE

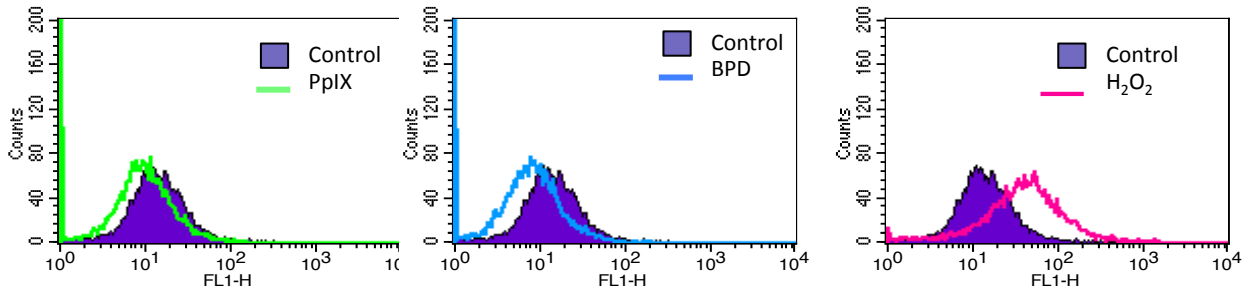

Supplement: Supplementary file [file 398750-1.pdf]
